# Supplementary material for: Anti-diabetic activity of canophyllol fromCratoxylum cochinchinense(Lour.) Blume in type 2 diabetic mice by activation of AMP-activated kinase and regulation of PPARγ
Source: Royal Society of Chemistry journal article supplement (doi:10.1039/c8fo02169d), 2019-01-01
Supplement: c8fo02169d1.pdf [file c8fo02169d1.pdf]

**Anti-diabetic activity of canophyllol from *Cratoxylum cochinchinense* (Lour.) Blume in type 2 diabetic mice by activation of AMP-activated kinase and regulation of PPAR $\gamma$**

Yibing Lv<sup>a</sup>, Qian Ming<sup>b</sup>, Ji Hao<sup>a</sup>, Yun Huang<sup>a</sup>, Hao Chen<sup>a</sup>, Qiang Wang<sup>a</sup>, Xinzhou Yang<sup>a,\*</sup>, Ping Zhao<sup>b,\*</sup>

<sup>a</sup>School of Pharmaceutical Sciences, South-Central University for Nationalities, 182 Min-Zu Road, Wuhan 430074, China

\*E-mail addresses: xzyang@mail.scuec.edu.cn (X.Z. Yang); Fax: +86 27 67841196; Tel.: +86 27 67841196.

<sup>b</sup>School of Life Sciences, South-Central University for Nationalities, 182 Min-Zu Road, Wuhan 430074, China

\*E-mail addresses: p.zhao@scuec.edu.cn (P. Zhao); Fax: +86 27 67841906; Tel.: +86 27 67842576.

†Electronic supplementary information (ESI) available. See DOI:

## **Supporting Information Contents**

**S1. Screening methodology validation**

**S2.  $^1\text{H}$ -NMR spectrum of canophyllol**

**S3.  $^{13}\text{C}$ -NMR spectrum of canophyllol**

**S4. Part enlarging of  $^{13}\text{C}$ -NMR spectrum of canophyllol**

**S5. Detailed information of High-fat diet**

**S6. Results of pre-studies**

## **S1. Screening Methodology Validation**

There are several papers reported that IRAP-mOrange and GLUT4-eGFP could be applied to detect the GLUT4 translocation in L6 (Wang et al., 2009; Zhou et al., 2016; Huang et al., 2016) and 3T3-L1 cells (Bai et al., 2007; Jiang et al. 2008). In order to validate the feasibility of our IRAP translocation assay for discovering potential hypoglycemic agents, we have observed the effects when the GLUT4-eGFP or IRAP-marked L6 cells treated with insulin and berberine which are definitely pharmacodynamic GLUT4 agonists. L6 cells which stably express IRAP-mOrange and GLUT4-eGFP were cultured in  $\alpha$ -MEM supplemented with 10% fetal bovine serum and 1% antibiotics (100 U/mL penicillin and 100  $\mu$ g/mL streptomycin) at 37 °C in 5% CO<sub>2</sub>. L6 cells was seeded in 48 well plates, and incubated until 100% confluence and then starved in serum-free MEM- $\alpha$  for 2 h. Afterwards, L6 cells were treated with insulin (10 nM) and berberine (5  $\mu$ M). The cells were taken photos with a laser-scanning confocal microscope LSM 510 (Carl Zeiss, Jena, Germany) to supervise the IRAP-mOrange and GLUT4-eGFP translocation. And the images were captured with 555 nm excitation laser every 10 seconds in first 5 minutes and then every 5 minutes in later 30 minutes.

During the experiment, as time went on, we could observe the green and red fluorescence enhanced significantly after treating with insulin and berberine in L6 cells (Fig. 1). The results showed that GLUT4 and IRAP simultaneously translocated onto the plasma membrane in 30 min when adding the GLUT4 agonist. GLUT4 has mainly been recruited to the PM throughout to the GLUTs storage vesicles (GSV). Three main proteins stored in GSV are GLUT4, IRAP, and Sortilin (Shi et al., 2005). It was reported that IRAP and GLUT4 displayed a strong colocalization (Kumar et al., 2010; Rubin et al., 2009) in many researches. Thus, detecting the IRAP can indirectly reflect the situation of GLUT4. So our results could be explained that detecting the IRAP-mOrange fluorescence could indirectly reflect the GLUT4 translocation. As the

red fluorescence is more conspicuous than green fluorescence for observation, so we choose the IRAP-mOrange fluorescence assay for reflecting GLUT4 translocation.

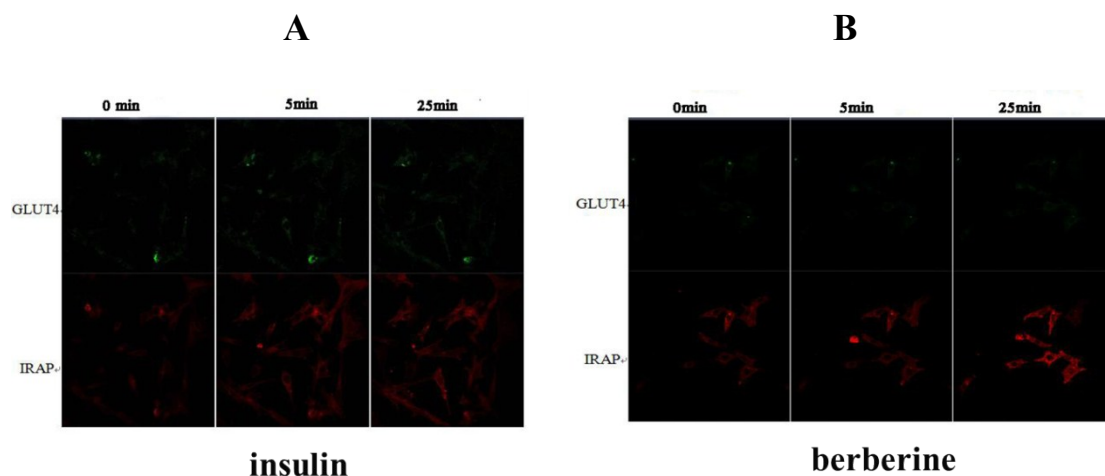

**Figure. 1** L6 cells were infected with IRAP-mOrange and GLUT4-eGFP in order to detect externalized GLUT4 translocation by confocal microscopy. (A) Confocal images in L6 cells incubated in the absence (0 min) or presence of insulin for 5min, 30 minutes. (B) Confocal images in L6 cells incubated in the absence (0 min) or presence of berberine for 5 min, 30 minutes.

## References

- Bai, L.; Wang, Y.; Fan, J.; Chen, Y.; Ji, W.; Qu, A.; Xu, P.; James, D. E.; Xu, T. Dissecting multiple steps of GLUT4 trafficking and identifying the sites of insulin action. *Cell. Metab.* 2007, 5, 47-57.
- Huang, M.; Zhao, P.; Xiong, M. R.; Zhou, Q.; Zheng, S. J.; Ma, X. H.; Xu, C.; Yang, J.; Yang, X. Z.; Zhang, T. C. Antidiabetic activity of perylenequinonoid-rich extract from *Shiraia bambusicola* in KK-Ay Mice with Spontaneous Type 2 Diabetes Mellitus. *J. Ethnopharmac.* 2016, 191, 71-81.
- Jiang, L.; Fan, J.; Bai, L.; Wang, Y.; Chen, Y.; Yang, L.; Chen, L.; Xu, T. Direct

quantification of fusion rate reveals a distal role for AS160 in insulin-stimulated fusion of GLUT4 storage vesicles. *J. Biol. Chem.* 2008, 283, 8508-8516.

Kumar, A.; Lawrence, Jr.; Jung, D. Y.; Ko, H. J.; Keller, S. R.; Kim, J. K.; Magnuson, M. A.; Harris, T. E. Fat cellspecific ablation of rictor in mice impairs insulin-regulated fat cell and whole-body glucose and lipidmetabolism. *Diabetes.* 2010, 59, 1397–1406. doi: 10.2337/db09-1061.

Rubin, B. R.; Bogan, J. S. Intracellular retention and insulinstimulated mobilization of GLUT4 glucose transporters. *Vitam. Horm.* 2009, 80, 155–192. doi: 10.1016/S0083-6729(08)00607-9.

Shi, J.; Kandror, K. V. Sortilin is essential and sufficient for the formation of glut4 storage vesicles in 3T3-L1 adipocytes. *Dev. Cell.* 2005, 9, 99–108.

Wang, X.; Qu, F.; Chen, Z.; Liang, T.; Qu, A. Labeling and imaging of GLUT4 in live L6 cells with quantum dots. *Biochem. Cell. Biol.* 2009, 87, 687-694.

Zhou, Q.; Yang, X. Z.; Xiong, M. R.; Xu, X. L.; Zhen, L.; Chen, W. W.; Wang, Y.; Shen, J. H.; Zhao, P.; Liu, Q. H. Chloroquine Increases Glucose Uptake via Enhancing GLUT4 Translocation and Fusion with the Plasma Membrane in L6 Cells. *Cell Physiol. Biochem.* 2016, 38, 2030-2040.

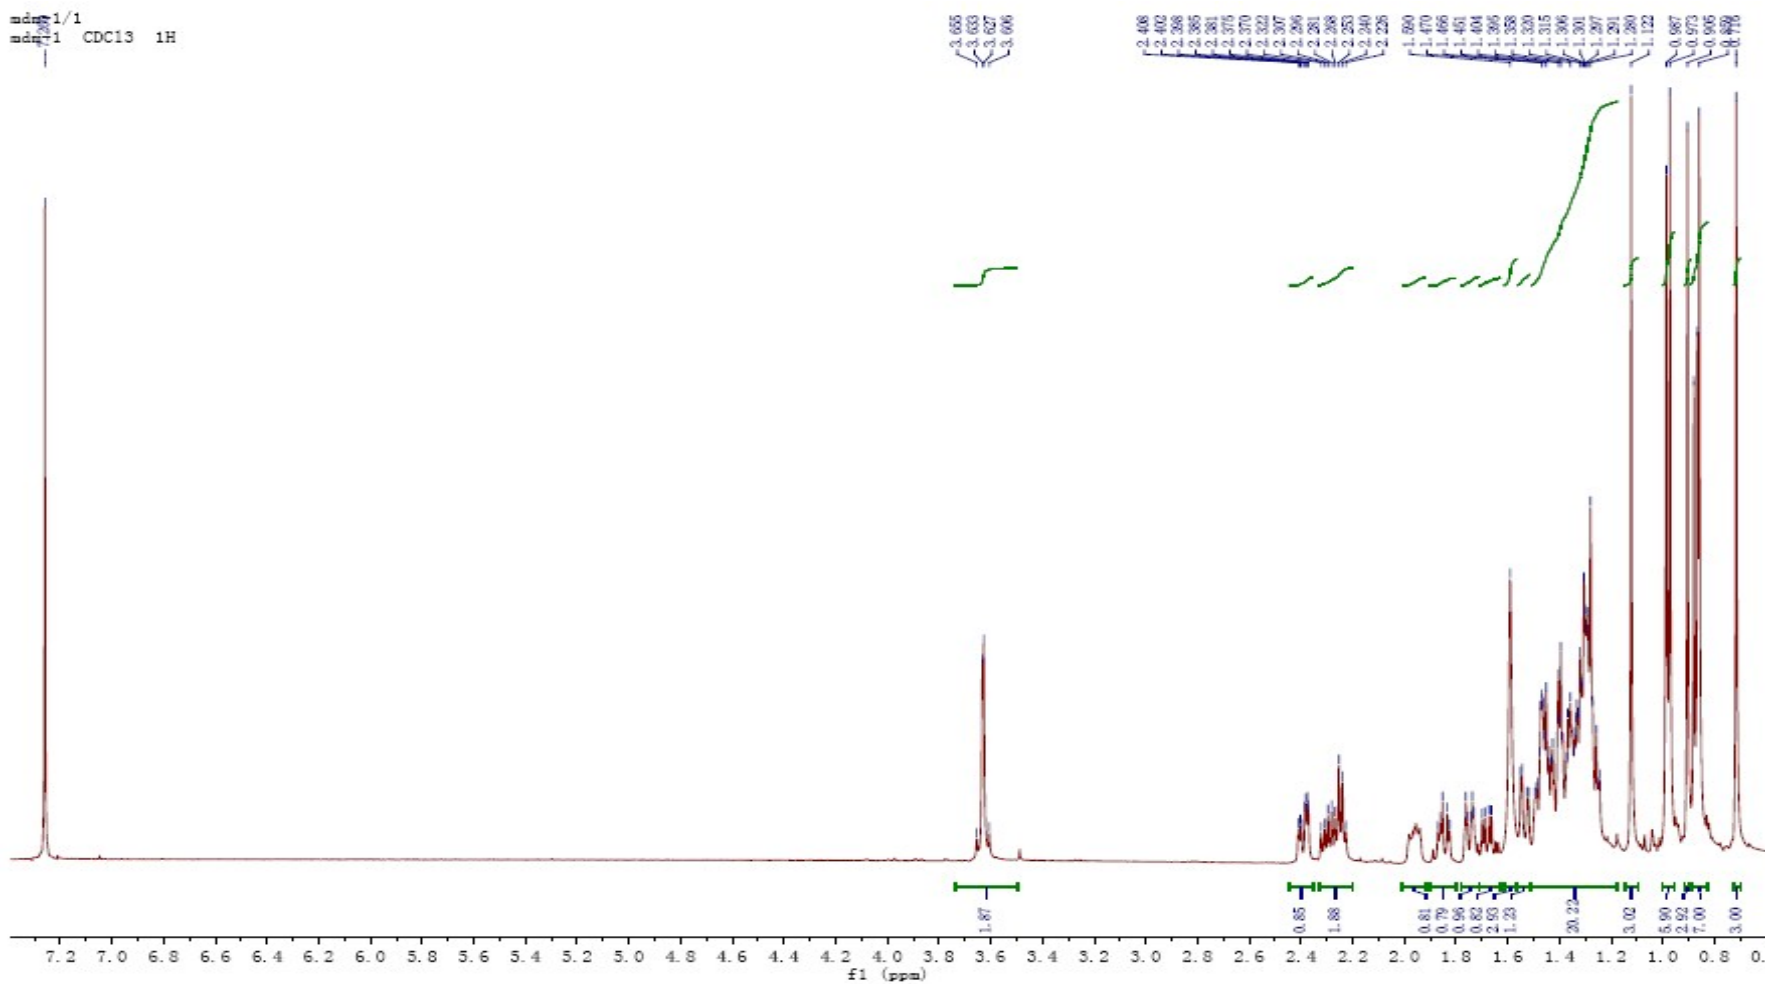

**S2. <sup>1</sup>H-NMR spectrum of canophyllol**

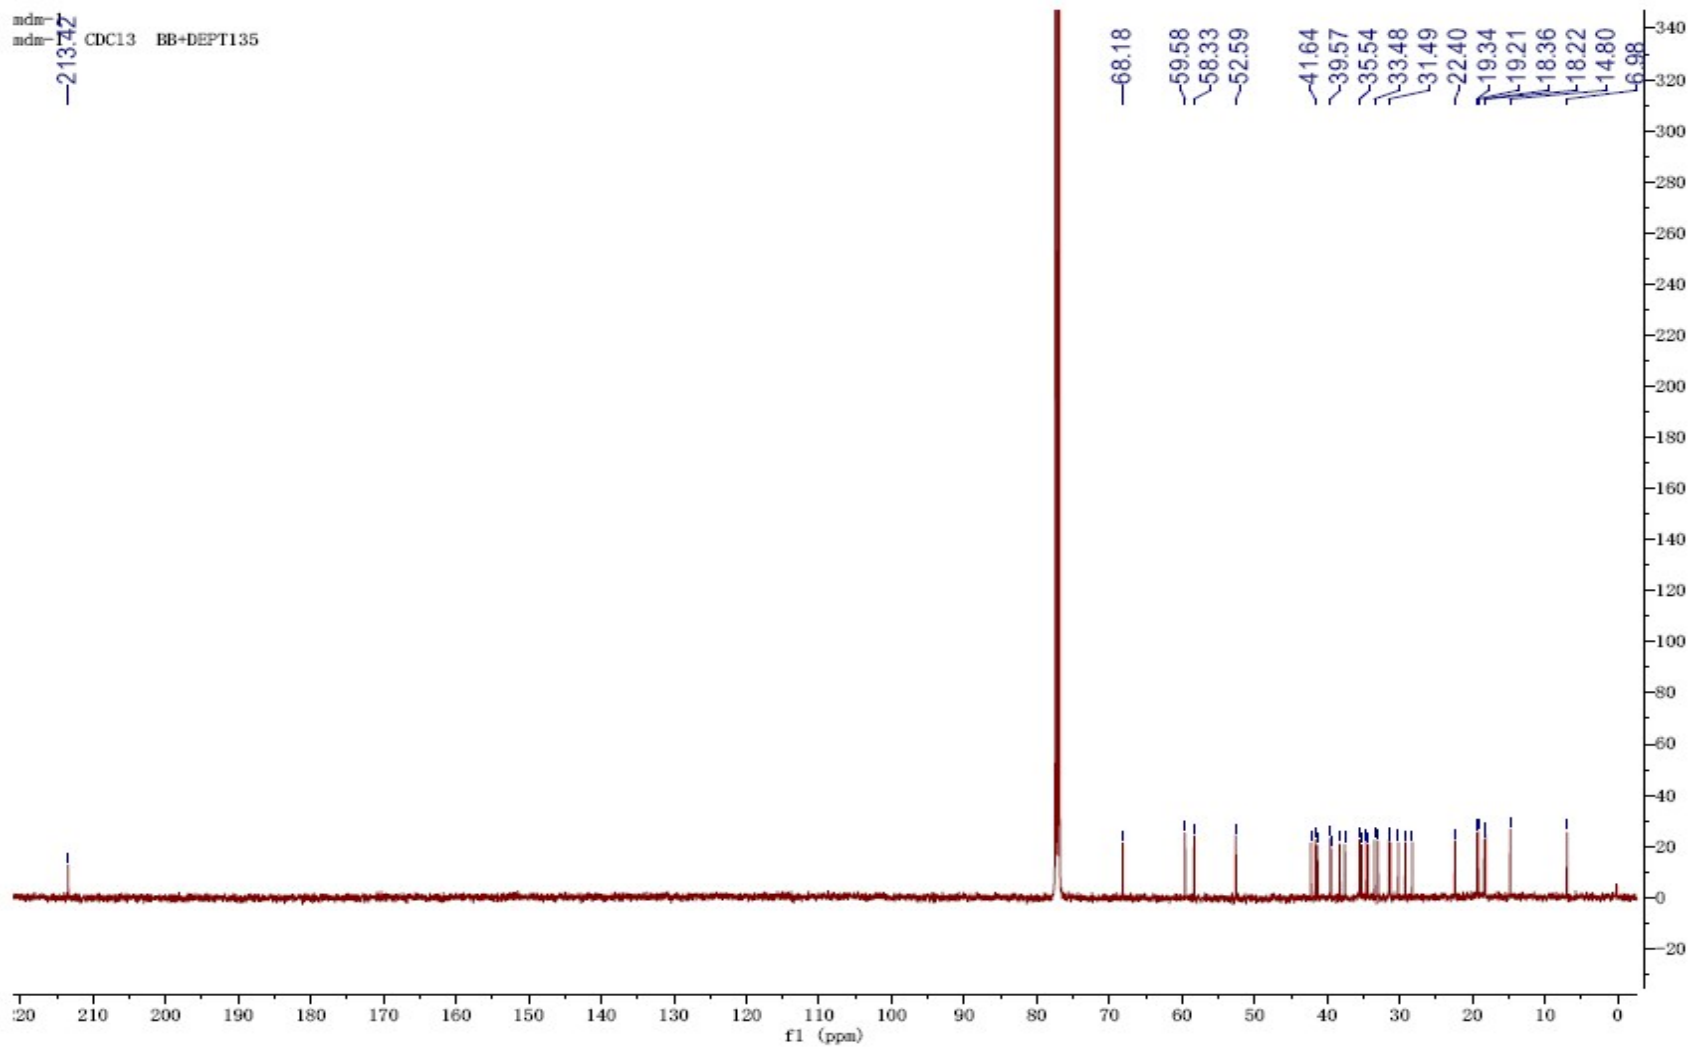

S3.  $^{13}\text{C}$ -NMR spectrum of canophyllol

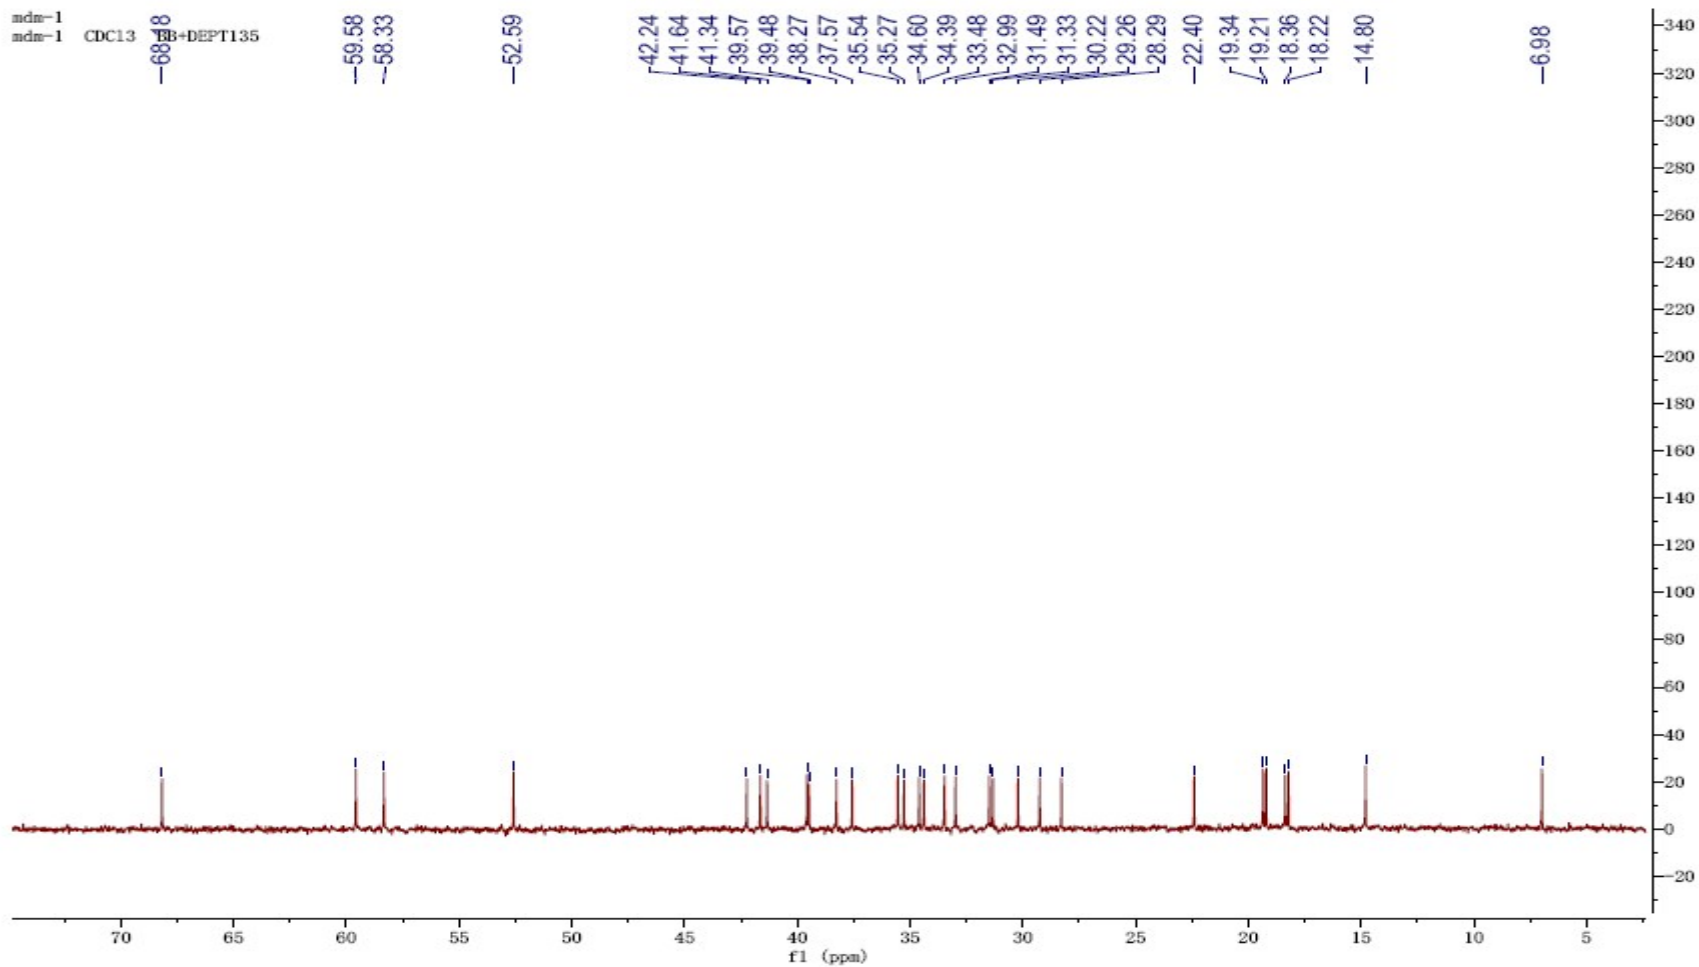

S4. Part enlarging of  $^{13}\text{C}$ -NMR spectrum of canophyllol



| <div style="text-align: center;">Informations</div> <div style="text-align: left;">Constituents</div> | Content      |
|-------------------------------------------------------------------------------------------------------|--------------|
| Protein                                                                                               | 225 g/Kg     |
| Fat                                                                                                   | 200 g/Kg     |
| carbohydrate substances                                                                               | 450 g/kg     |
| Cholesterol                                                                                           | 12.5 g/Kg    |
| Sodium cholate                                                                                        | 5 g/Kg       |
| Energy                                                                                                | 4500 kcal/Kg |

**S5. Detailed information of High-fat diet**

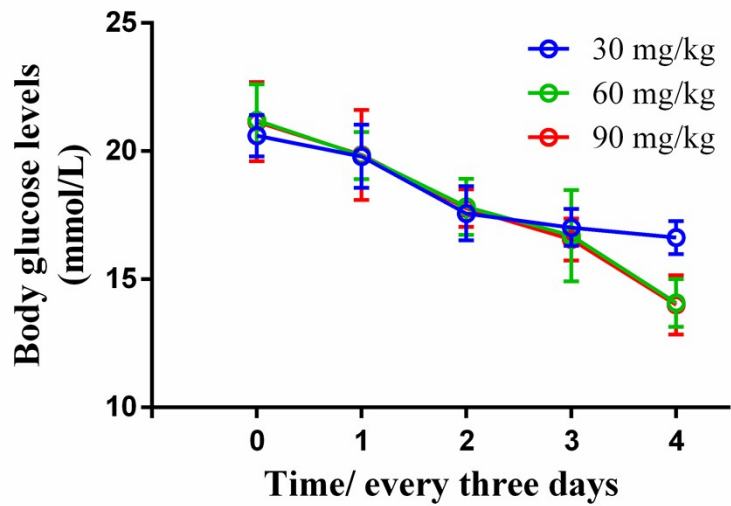

Pre-studies result for dosages of mice

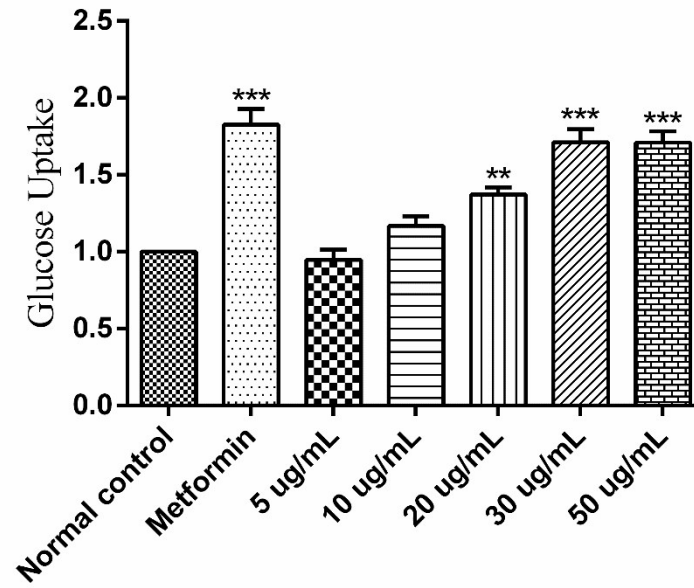

Pre-studies result for glucose uptake in cells

### S6.Results of pre-studies
